# Supplementary material
Source: PubMed Central journal article supplement (PMC4356834)
Supplement: AAC.04414-14_zac004153838so1.pdf [file AAC.04414-14_zac004153838so1.pdf]

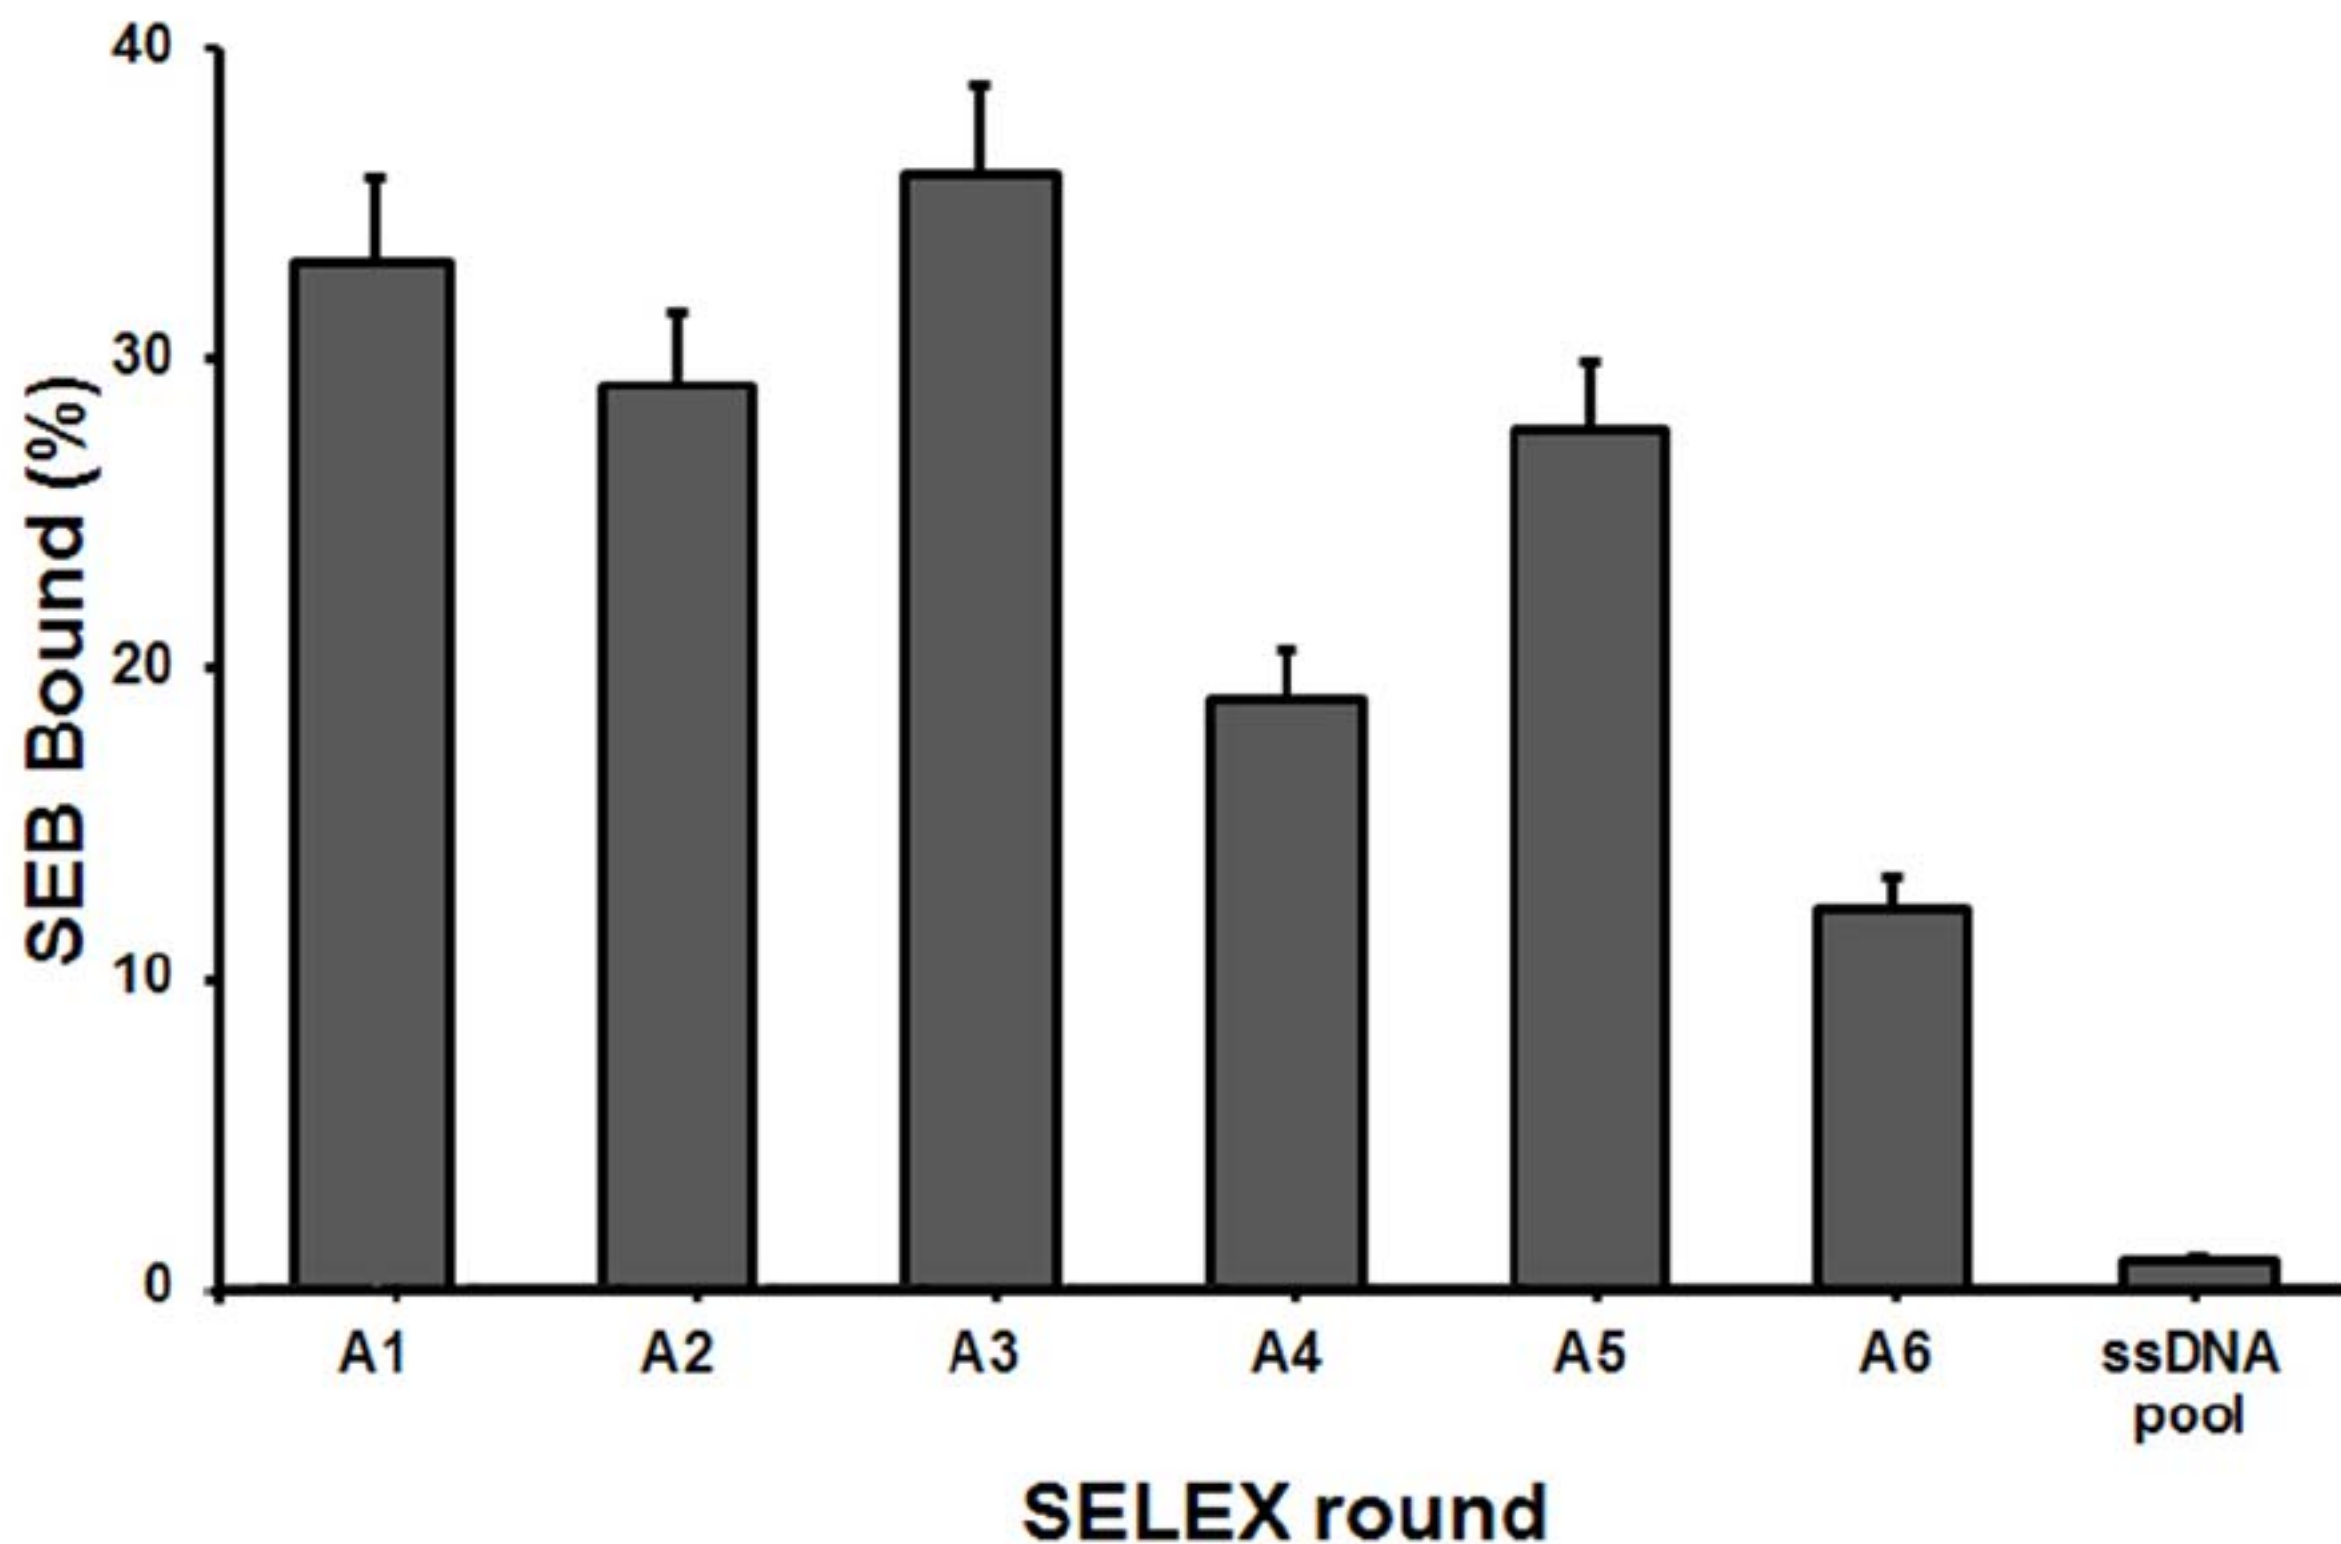

Figure. S1 The abilities of aptamers (200 ng) from the 11th round to bind SEB (20  $\mu$ M) were monitored by binding assay, demonstrating that all aptamers can bind with SEB. Each data represents the mean ( $n=3$ )  $\pm$  SD from three experiments.

**Table S1 primers and ssDNA pool**

| <b>ssDNA</b>              | <b>Sequence (5'→3')</b>                   |
|---------------------------|-------------------------------------------|
| <b>Lib</b>                | ATACCAGCTTATTCAATT–N60–AGATAGTAAGTGCAATCT |
| <b>Sense primer 1</b>     | ATACCAGCTTA TTCAATT                       |
| <b>Sense primer 2</b>     | FITC-ATACCAGCTTA TTCAATT                  |
| <b>Antisense primer 1</b> | AGATTGCACTTACTATCT                        |
| <b>Antisense primer 2</b> | Biotin-AGATTGCACTTACTATCT                 |

**Table S2. The conditions of SELEX**

| Rounds | SEB: ssDNA<br>(ng: pmol) | KCl<br>(mM) | Incubation<br>(min) | Washing<br>(times) |
|--------|--------------------------|-------------|---------------------|--------------------|
| 1      | 100:2000                 | 5           | 60                  | 2                  |
| 2-3    | 100:200                  | 5           | 55                  | 2                  |
| 4-6    | 80:180                   | 10          | 45                  | 3                  |
| 7-9    | 65:150                   | 15          | 35                  | 4                  |
| 10-11  | 50:120                   | 20          | 25                  | 5                  |
